# Supplementary material for: Impact of maternal high fat diet on hypothalamic transcriptome in neonatal Sprague Dawley rats
Source: PubMed Central journal article supplement (PMC5730210; doi:10.1371/journal.pone.0189492), 2017-12-14
Supplement: pone.0189492.s001.pdf [file pone.0189492.s001.pdf]

| <b>Calculated Nutritional Parameters</b><br>(% indicates values v/w) | <b>HFD</b>         | <b>CON</b>         |
|----------------------------------------------------------------------|--------------------|--------------------|
| Protein                                                              | 22.60%             | 22.60%             |
| Total Fat                                                            | 23.50%             | 5.30%              |
| Crude Fibre                                                          | 5.40%              | 5.40%              |
| AD Fibre                                                             | 5.40%              | 5.40%              |
| Digestible Energy                                                    | 19 MJ / Kg         | 15.4 MJ / Kg       |
| Energy contribution for non-fibre carbohydrates                      | 6.56 MJ/Kg (34.5%) | 9.50 MJ/Kg (61.7%) |
| Total calculated digestible energy from lipids                       | 43.00%             | 12.00%             |
| Total calculated digestible energy from protein                      | 21.00%             | 25.80%             |
| <b>Ingredients</b>                                                   | <b>HFD</b>         | <b>CON</b>         |
| Casein (Acid)                                                        | 233 g/Kg           | 233 g/Kg           |
| Sucrose                                                              | 201 g/Kg           | 201 g/Kg           |
| Lard                                                                 | 207 g/Kg           | 23 g/Kg            |
| Soya Bean Oil                                                        | 29 g/Kg            | 29 g/Kg            |
| Cellulose                                                            | 58 g/Kg            | 58 g/Kg            |
| Wheat Starch                                                         | 92 g/Kg            | 276 g/Kg           |
| Dextrinised Starch                                                   | 117 g/Kg           | 117 g/Kg           |
| L Methionine                                                         | 3.5 g/Kg           | 3.5 g/Kg           |
| Calcium Carbonate                                                    | 6.4 g/Kg           | 6.4 g/Kg           |
| Sodium Chloride                                                      | 2.6 g/Kg           | 2.6 g/Kg           |
| AIN93 Trace Minerals                                                 | 1.6 g/Kg           | 1.6 g/Kg           |
| Potassium Citrate                                                    | 19.2 g/Kg          | 19.2 g/Kg          |
| Dicalcium Phosphate                                                  | 15.1 g/Kg          | 15.1 g/Kg          |
| Potassium Sulphate                                                   | 1.6 g/Kg           | 1.6 g/Kg           |
| Choline Chloride (75%)                                               | 1.3 g/Kg           | 1.3 g/Kg           |
| AIN93 Vitamins                                                       | 12 g/Kg            | 12 g/Kg            |
| <b>Calculated Fatty Acid Composition</b><br>(% indicates values v/w) | <b>HFD</b>         | <b>CON</b>         |
| Saturated Fats C12                                                   | 0 or less Trace    | 0 or less Trace    |
| Myristic Acid 14:0                                                   | 0.30%              | 0.04%              |
| Palmitic Acid 16:0                                                   | 5.80%              | 0.90%              |
| Stearic Acid 18:0                                                    | 3.70%              | 0.50%              |
| Other Saturated Fats                                                 | 0.10%              | 0.03%              |
| Palmitoleic Acid 16:1                                                | 0.40%              | 0.05%              |
| Oleic Acid 18:1                                                      | 7.70%              | 1.50%              |
| Gadoleic Acid 20:1                                                   | 0.20%              | 0.02%              |
| Linoleic Acid 18:2 n6                                                | 4.46%              | 1.80%              |
| Linolenic Acid 18:3 n3                                               | 0.49%              | 0.20%              |
| EPA 20:5 n3                                                          | No data            | No data            |

|                             |         |         |
|-----------------------------|---------|---------|
| DHA 22:6 n3                 | No data | No data |
| Total n3                    | 0.52%   | 0.23%   |
| Total n6                    | 4.50%   | 1.82%   |
| Total Mono Unsaturated Fats | 8.24%   | 1.53%   |
| Total Poly Unsaturated Fats | 5.11%   | 2.07%   |
| Total Saturated Fats        | 10.03%  | 1.50%   |
