# Supplementary material for: Impact of maternal high fat diet on hypothalamic transcriptome in neonatal Sprague Dawley rats
Source: PubMed Central journal article supplement (PMC5730210; doi:10.1371/journal.pone.0189492), 2017-12-14
Supplement: pone.0189492.s002.pdf [file pone.0189492.s002.pdf]

| <b>Female differentially expressed genes, adj.P-value&lt;0.05</b> |        |         |             |
|-------------------------------------------------------------------|--------|---------|-------------|
| Name                                                              | logFC  | PValue  | adj.p.value |
| Igf2                                                              | -1.323 | 1.4E-15 | 2.0E-11     |
| Col1a1                                                            | -1.104 | 2.3E-14 | 1.1E-10     |
| Col1a2                                                            | -1.095 | 2.9E-13 | 8.9E-10     |
| Slc6a13                                                           | -1.848 | 4.8E-12 | 1.1E-08     |
| Alox15                                                            | -1.670 | 6.8E-12 | 1.4E-08     |
| Col3a1                                                            | -1.008 | 4.0E-11 | 7.1E-08     |
| Slc13a4                                                           | -2.023 | 1.2E-10 | 1.9E-07     |
| Aldh1a2                                                           | -2.143 | 6.1E-10 | 7.9E-07     |
| Hbb                                                               | -1.495 | 7.4E-10 | 8.7E-07     |
| Ifi27                                                             | -0.890 | 1.0E-09 | 1.1E-06     |
| Slc6a20                                                           | -1.627 | 1.4E-09 | 1.3E-06     |
| Aebp1                                                             | -1.020 | 1.4E-09 | 1.3E-06     |
| Hbb-b1                                                            | -1.345 | 1.9E-09 | 1.6E-06     |
| Hba2                                                              | -1.321 | 3.0E-09 | 2.3E-06     |
| Ogn                                                               | -1.670 | 5.6E-09 | 3.4E-06     |
| Hba1                                                              | -1.340 | 5.6E-09 | 3.4E-06     |
| Slc22a6                                                           | -1.749 | 6.1E-09 | 3.6E-06     |
| Slc4a1                                                            | -1.701 | 1.2E-08 | 6.5E-06     |
| Cdkn1c                                                            | -0.717 | 1.2E-08 | 6.5E-06     |
| Bgn                                                               | -0.694 | 2.3E-08 | 1.2E-05     |
| Alas2                                                             | -1.459 | 8.0E-08 | 3.5E-05     |
| Gjb2                                                              | -0.948 | 1.6E-07 | 6.4E-05     |
| Mgp                                                               | -1.214 | 1.6E-07 | 6.4E-05     |
| Thbd                                                              | -1.143 | 1.7E-07 | 6.4E-05     |
| Fbln1                                                             | -0.722 | 3.7E-07 | 1.3E-04     |
| Colec12                                                           | -0.996 | 4.5E-07 | 1.6E-04     |
| Ptgds                                                             | -2.597 | 7.1E-07 | 2.3E-04     |
| Slc12a4                                                           | -0.479 | 7.2E-07 | 2.3E-04     |
| Gjb6                                                              | -0.854 | 8.0E-07 | 2.5E-04     |
| Hp                                                                | 2.307  | 1.5E-06 | 4.5E-04     |
| LOC689064                                                         | -1.233 | 1.9E-06 | 5.3E-04     |
| Angptl2                                                           | -1.399 | 1.9E-06 | 5.5E-04     |
| Cxcl12                                                            | -0.427 | 3.2E-06 | 8.9E-04     |
| Serpinh1                                                          | -0.319 | 4.7E-06 | 1.3E-03     |
| Col5a1                                                            | -0.645 | 5.7E-06 | 1.5E-03     |
| Pcolce                                                            | -1.085 | 1.1E-05 | 2.7E-03     |
| Dcn                                                               | -0.966 | 1.4E-05 | 3.2E-03     |
| Nbl1                                                              | -0.369 | 1.4E-05 | 3.2E-03     |
| Cfh                                                               | -0.495 | 1.5E-05 | 3.4E-03     |
| C3                                                                | 2.179  | 1.7E-05 | 3.6E-03     |
| Ghdc                                                              | -0.456 | 2.3E-05 | 4.9E-03     |

|           |        |         |         |
|-----------|--------|---------|---------|
| Lamc3     | -0.652 | 2.6E-05 | 5.4E-03 |
| Sult1a1   | -1.302 | 2.9E-05 | 5.8E-03 |
| Gsn       | 0.468  | 2.9E-05 | 5.8E-03 |
| Fn1       | -0.405 | 3.4E-05 | 6.7E-03 |
| Ctss      | -0.402 | 3.4E-05 | 6.7E-03 |
| Txnip     | -0.353 | 3.5E-05 | 6.7E-03 |
| Mrc1      | -0.796 | 5.3E-05 | 1.0E-02 |
| Col6a2    | -0.457 | 6.4E-05 | 1.2E-02 |
| Kiss1     | 1.162  | 6.7E-05 | 1.2E-02 |
| Efemp1    | -0.930 | 6.7E-05 | 1.2E-02 |
| Syn3      | 0.484  | 7.1E-05 | 1.3E-02 |
| Ptrf      | -0.466 | 7.2E-05 | 1.3E-02 |
| Slc5a5    | -1.081 | 7.8E-05 | 1.4E-02 |
| Gfap      | -0.346 | 7.8E-05 | 1.4E-02 |
| LOC287167 | -1.014 | 8.0E-05 | 1.4E-02 |
| Cpeb4     | 0.339  | 8.3E-05 | 1.4E-02 |
| Rsad2     | -0.977 | 9.6E-05 | 1.6E-02 |
| Avp       | -0.499 | 1.0E-04 | 1.6E-02 |
| Lum       | -0.689 | 1.1E-04 | 1.8E-02 |
| Fcho1     | 0.275  | 1.1E-04 | 1.8E-02 |
| Nid2      | -0.458 | 1.2E-04 | 1.8E-02 |
| Mfap4     | -0.549 | 1.3E-04 | 1.9E-02 |
| Vwf       | -0.368 | 1.4E-04 | 2.2E-02 |
| Egflam    | -0.503 | 1.6E-04 | 2.4E-02 |
| Mrc2      | -0.469 | 1.7E-04 | 2.6E-02 |
| Kank2     | -0.446 | 1.8E-04 | 2.6E-02 |
| Vtn       | -0.404 | 1.8E-04 | 2.6E-02 |
| Pltp      | -0.279 | 1.9E-04 | 2.8E-02 |
| Man2b2    | -0.555 | 2.1E-04 | 3.0E-02 |
| Fgl2      | -0.791 | 2.2E-04 | 3.0E-02 |
| Olfml2a   | -0.357 | 2.2E-04 | 3.0E-02 |
| Rarres2   | -0.939 | 2.2E-04 | 3.0E-02 |
| Fstl1     | -0.326 | 2.3E-04 | 3.1E-02 |
| Cdc25b    | -0.480 | 2.5E-04 | 3.2E-02 |
| Fam46c    | -1.137 | 2.8E-04 | 3.6E-02 |
| Anxa5     | -0.318 | 2.9E-04 | 3.7E-02 |
| Slc2a12   | -0.477 | 3.0E-04 | 3.7E-02 |
| Slc16a11  | -0.611 | 3.0E-04 | 3.7E-02 |
| Rpp40     | -0.739 | 3.2E-04 | 3.8E-02 |
| Slc9a2    | -0.969 | 3.2E-04 | 3.8E-02 |
| Myh9      | -0.283 | 3.4E-04 | 4.1E-02 |
| Dab2      | -0.416 | 3.5E-04 | 4.2E-02 |
| Fau       | -0.360 | 3.7E-04 | 4.3E-02 |

|           |        |         |         |
|-----------|--------|---------|---------|
| Serpinb6b | -0.945 | 4.0E-04 | 4.6E-02 |
| Serping1  | -0.678 | 4.4E-04 | 4.9E-02 |

| <b>Male differentially expressed genes, adj.P-value&lt;0.05</b> |        |         |             |
|-----------------------------------------------------------------|--------|---------|-------------|
| Name                                                            | logFC  | PValue  | adj.p.value |
| Aldh1a1                                                         | -1.709 | 6.8E-11 | 9.6E-07     |
| Tf                                                              | -0.522 | 1.6E-06 | 5.4E-03     |
| Slc6a3                                                          | -2.093 | 1.9E-06 | 5.4E-03     |
| Th                                                              | -0.978 | 1.9E-06 | 5.4E-03     |
| Gfap                                                            | -0.492 | 2.3E-06 | 5.4E-03     |
| Col3a1                                                          | -0.951 | 5.0E-06 | 1.0E-02     |
| Alox15                                                          | -1.140 | 1.9E-05 | 2.9E-02     |
| Col1a1                                                          | -0.917 | 2.6E-05 | 3.6E-02     |
